# Supplementary material
Source: PubMed Central journal article supplement (PMC1560927)
Supplement: plntcell_tpc.106.041509_1.pdf [file plntcell_tpc.106.041509_1.pdf]

# Supplemental Figure 1

|         |                                                                                      |     |
|---------|--------------------------------------------------------------------------------------|-----|
|         | ↓                                                                                    |     |
| Nb Hxk1 | MKKKATVGAVVVCTAAVCAVAALIVNHRMRKSSKWARARAILLRFEEKCGTPDAKLRQVADAMTVEMHAGLASEGGSKLKM    | 80  |
| At HXK1 | MCKVAVGATVVCCTAAVCAVAALIVRRRMRQSSGKWRVLAILLKAFEDCATPIISKLRQVADAMTVEMHAGLASEGGSKLKM   | 80  |
| At HXK2 | MCKVAVATTVVCSVAVCAAAALIVRRRMRKSSAGKWARVLEILLKAFEDCATPIIAKLRQVADAMTVEMHAGLASEGGSKLKM  | 80  |
| Le Hxk2 | MKKKATVGAVVVCTAAVCAVAALIVNHRMRKSSKWARARAILLRFEEKCGTPDAKLRQVADAMTVEMHAGLASEGGSKLKM    | 80  |
| St HK1  | MKKVTVGAVVVCAAAVCAVAALIVNHRMRKSSKWARARAILLRFEEKCGTPDAKLRQVADAMTVEMHAGLASEGGSSRC      | 80  |
| St HK2  | MKKKATVGAVVVCTAAVCAVAALIVNHRMRKSSKWARARAILLRFEEKCGTPDAKLRQVADAMTVEMHAGLASEGGSKLKM    | 80  |
| So HxK1 | MKKAAVGAVVVCTAAVCAAAALIVRRRMRKSSKWRVMAILLKELDDNCGTPIGLKLRQVADAMTVEMHAGLASEGASKLKM    | 80  |
|         |                                                                                      |     |
| Nb Hxk1 | LITVYDNLPTGDEAGVFYALDLGGTNFRVLRVQLGGKGGGIIHOEFBAESIPPILMVGISEALFDYITAEALAKFVAESEE    | 160 |
| At HXK1 | LISYVDNLPSGDEKGLFYALDLGGTNFRVLRVQLGGKQERVVKQEFEEVSIPPILMTGGSDELNFNIAEALAKFVAESEE     | 160 |
| At HXK2 | LISYVDNLPSGDETCGFYALDLGGTNFRVLRVQLGGKHDRVVKREFKEESIPPILMTGKSHLELDFIVDVLAKFVAESEE     | 160 |
| Le Hxk2 | LISYVDNLPTGDEAGVFYALDLGGTNFRVLRVQLGGKGGGIIHOEFBAESIPPILMVGISEALFDYITAEALAKFVDESEE    | 160 |
| St HK1  | LISYVDNLPTGDEAGVFYALDLGGTNFRVLRVQLGGKGGGIIHOEFBAESIPPILMVGISEALFDYITAEALAKFVAESEE    | 160 |
| St HK2  | LISYVDNLPTGDEGGVFYALDLGGTNFRVLRVQLGGKGGGIIHOEFBAESIPPILMVGISEALFDYITAEALAKFVAESEE    | 160 |
| So HxK1 | LISYVDNLPTGDEHGLFYALDLGGTNFRVLRVQLGGKEKRVVEQEFDEVSIPPILMVGISEALFDYITAEALAKFVAESEE    | 160 |
|         |                                                                                      |     |
| Nb Hxk1 | KFQPPGKQRELGFITFSPFMOTSI NSGTIMRWTKGFSIDDAVQODVVCELTKAMKRCVDMRVVSALVNDTVGTLAGGKY     | 240 |
| At HXK1 | DFHLPGRQRELGFITFSPFKQTSLS SSGSLIKWTGKFSIEEAVQODVVGALNKALERVGLDMRTAALVNDTVGTLAGGRY    | 240 |
| At HXK2 | DFHLPGRQRELGFITFSPFKQLSLS SSGTLLNWTGKFSIDDTVQKDVVCELVKAMERVGLDMRTAALVNDTVGTLAGGRY    | 240 |
| Le Hxk2 | KFHPPGKQRELGFITFSPFMOTSI NSGTILRWTKGFSIDDTVQKDVVCELTAMOKREIDMRVVSALVNDTVGTLAGGRF     | 240 |
| St HK1  | KFHPPGKQRELGFITFSPFMOTSI NSGTILRWTKGFSIDDAVQODVVCELTAMKKEKVLDMRVVSALVNDTVGTLAGGKY    | 240 |
| St HK2  | EFHPPGKQRELGFITFSPFMOTSI NSGTILRWTKGFSIDDTVQKDVVCELTAMOKREIDMRVVSALVNDTVGTLAGGRF     | 240 |
| So HxK1 | GLHPEGRQRELGFITFSPFKQTSLS SSGTLLNWTGKFNLEDDTVQEDVVAELTKAMLRKGVDMRVVSALVNDTVGTLAGGRY  | 240 |
|         |                                                                                      |     |
| NbHxk1  | TINDVAVAVILGCTGTAAYVERVAQAI PKWHGPEPKSGEMVINMEWGNFRSSHLPLTEYDHALDNEISLNPGEQIFEKMTSG  | 320 |
| At HXK1 | YNPDVVAVAVILGCTGTAAYVERATAI PKWHGILLPKSGEMVINMEWGNFRSSHLPLTEFDHTLDFESLNPGEQIFEKTISSG | 320 |
| At HXK2 | TNDVVAVAVILGCTGTAAYVERAHAIPKWHGILLPKSGEMVINMEWGNFRSSHLPLTEYDHSLDVDSLNPGEQIFEKTISSG   | 320 |
| Le Hxk2 | TDKDVSIAVILGCTGTAAYVERVAQAI PKWHGPEPKSGEMVINMEWGNFRSSHLPLTEYDHALDNEISLNPGEQIFEKTCSSG | 320 |
| St HK1  | TOKDVAVAVILGCTGTAAYVERVAQAI PKWHGPEPKSGEMVINMEWGNFRSSHLPLTEYDHALDNEISLNPGEQIFEKMTSG  | 320 |
| St HK2  | TNKDVSIAVILGCTGTAAYVERVAQAI PKWHGPEPKSGEMVINMEWGNFRSSHLPLTEYDHALDNEISLNPGEQIFEKTCSSG | 320 |
| So HxK1 | YKEDVIAVAVILGCTGTAAYVERASAIPKWHGPEPKSGEMVINMEWGNFRSSYLPTEYDHALDNEISLNPGEQIFEKMTSG    | 320 |
|         |                                                                                      |     |
| Nb Hxk1 | MYLGEILRRVLRMADEAGIFGDEVPK-LKSPFVLRTPDMSAMHDTSSDLRVVGDCLKLDILEISNTSLKTRRLVVELC       | 399 |
| At HXK1 | MYLGEILRRVLRMADEAFAFGDTVPSK-LRIPFIRTPDMSAMHDTSSDLKIVGSKIKDILEVPTSLKMRKVVISLC         | 399 |
| At HXK2 | MYLGEILRRVLRMADEAFAFGDITVPSK-LRIPFIRTPDMSAMHDTSSDLKVVGSKIKDILEVPTSSLKMRKVVISLC       | 399 |
| Le Hxk2 | MYLGEILRRVLRMADEAGIFGEEVPPK-LKNSFILRTPDMSAMHDTSSDLRVVGDCLKLDILEISNTSLKTRRLVVELC      | 399 |
| St HK1  | MYLGEILRRVLRVAEIVLAFAMRSLQSLKDSFVLRTPDMSAMHDTSSDLKVVGEKLDILEISNTSLKTRRLVVELC         | 400 |
| St HK2  | MYLGEILRRVLRMADEAGIFGEEVPPK-LKNSFILRTPDMSAMHDTSSDLRVVGDCLKLDILEISNTSLKTRRLVVELC      | 399 |
| So HxK1 | MYLGEIVRRVLRMADEASLFGDTVPSK-LRTPFIRTPDMSAMHDTSSDLKVVASKLDVLCIPNSSLKTRKTIIVVC         | 399 |
|         |                                                                                      |     |
| Nb Hxk1 | NIVATRGARLAAGVILGILKMKGRDIPROGGPKRMVVAMDGGLYEHYAYRTQLENTLKEBLLGDELATSIIVFHSNDGSG     | 479 |
| At HXK1 | NILATRGARLSAAGIYGLIKKLRDITKDEEVQKSVIAMDGGLFHEYTOFSECMSSSLKELLGDEASGSVEVTHSNDGSG      | 479 |
| At HXK2 | NILASRGARLSAAGIYGLIKKICRDATKDCGAQKSVIAMDGGLFHEYTOFSESMKSSLELLGDEVSEVTHSNDGSG         | 479 |
| Le Hxk2 | NIVATRGARLAAGIILGIIKMKCKDIPRESGPEKIVVAMDGGLYEHYTEYSKQLENTLVEBLLCKEMATSIIVFKHANDGSG   | 479 |
| St HK1  | NIVATRGARLDAAAGVILGILKMKGRDIPKQGGSERIVIAMDGGLYEHYTEYRMQLENTLKDLLGDELATSIIVFHSNDGSG   | 480 |
| St HK2  | NIVATRGARLSAAGIILGIIKMKKDIIPRESGPEKIVVAMDGGLYEHYTEYSKQLENTLVEBLLCKEMATSIIVFKHANDGSG  | 479 |
| So HxK1 | DVIASRGACTISAAGIILGLIKKLRDITLQGENQKSVIALDGGLFHEYAKRECMDDSLKELLGDEVAETIVIEHSNDGSG     | 479 |
|         |                                                                                      |     |
| Nb Hxk1 | IGAALLAASHSMYLEDKS-----                                                              | 497 |
| At HXK1 | IGAALLAASHSMYLEDS-----                                                               | 496 |
| At HXK2 | VGAALLAASHSMYLEDDSETS                                                                | 502 |
| Le Hxk2 | IGAALLAASHSMYVEDK-----                                                               | 496 |
| St HK1  | IGAALLAASHSMYLEDQA-----                                                              | 498 |
| St HK2  | IGAALLAASHSMYVEDK-----                                                               | 496 |
| So HxK1 | IGAALLAASHSMYLEDSE-----                                                              | 498 |
