# Supplementary material
Source: PubMed Central journal article supplement (PMC1560927)

# Supplemental Figure 2

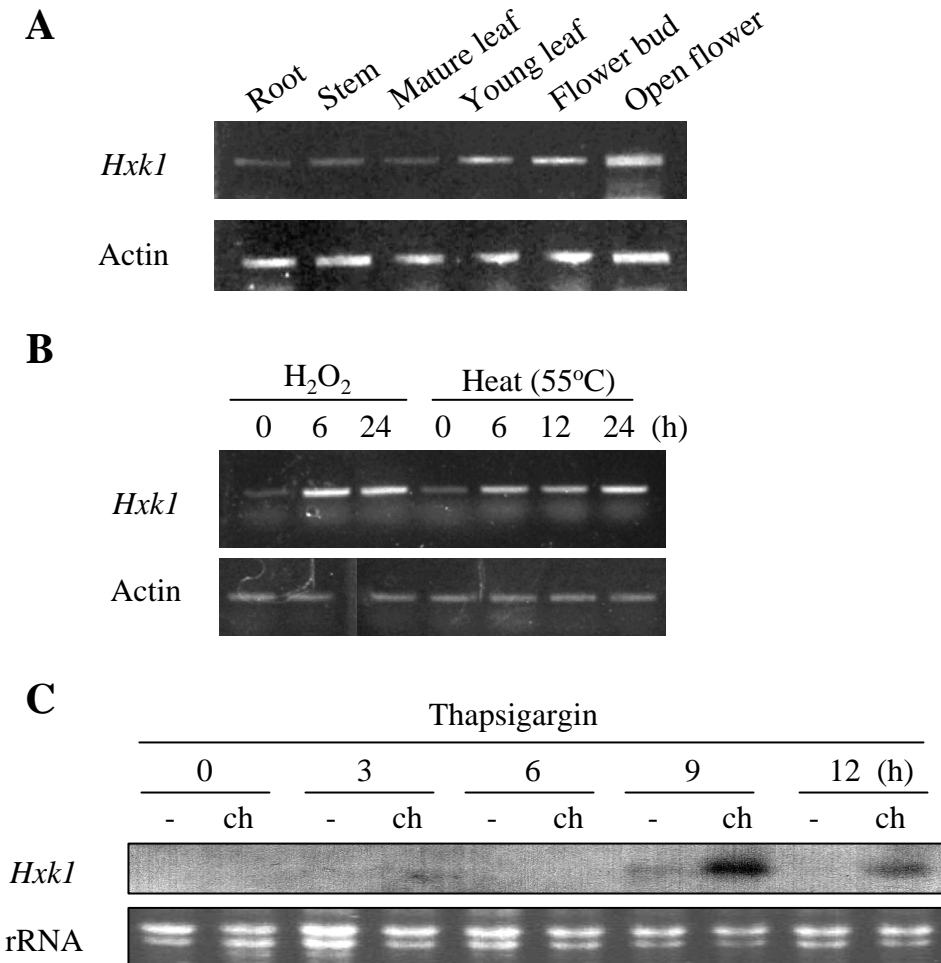

Supplement: plntcell_tpc.106.041509_2.pdf [file plntcell_tpc.106.041509_2.pdf]

# Supplemental Figure 3

**A**

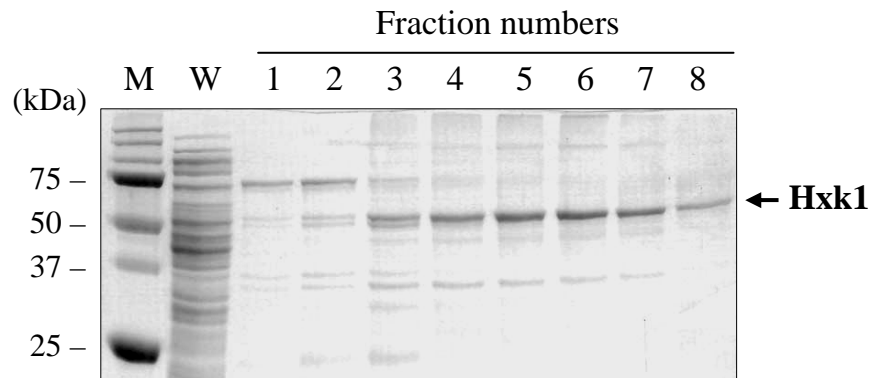

**B**

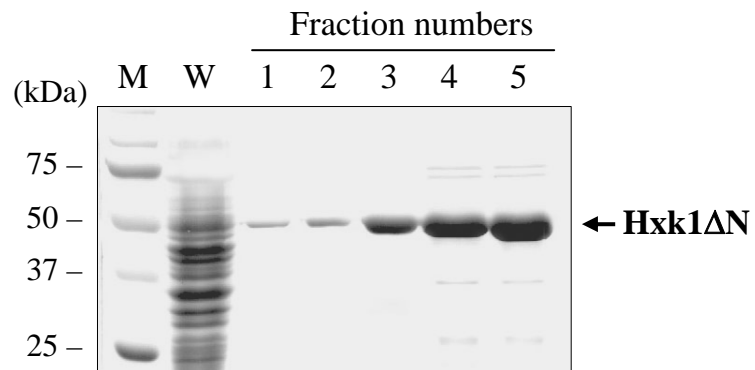

Supplement: plntcell_tpc.106.041509_3.pdf [file plntcell_tpc.106.041509_3.pdf]
